# Supplementary material for: Structural and Functional Analysis of Excised Skins and Human Reconstructed Epidermis with Confocal Raman Spectroscopy and in Microfluidic Diffusion Chambers
Source: MDPI journal article supplement (doi:10.3390/pharmaceutics14081689), 2022-08-13
Supplement: s1 [file s1]

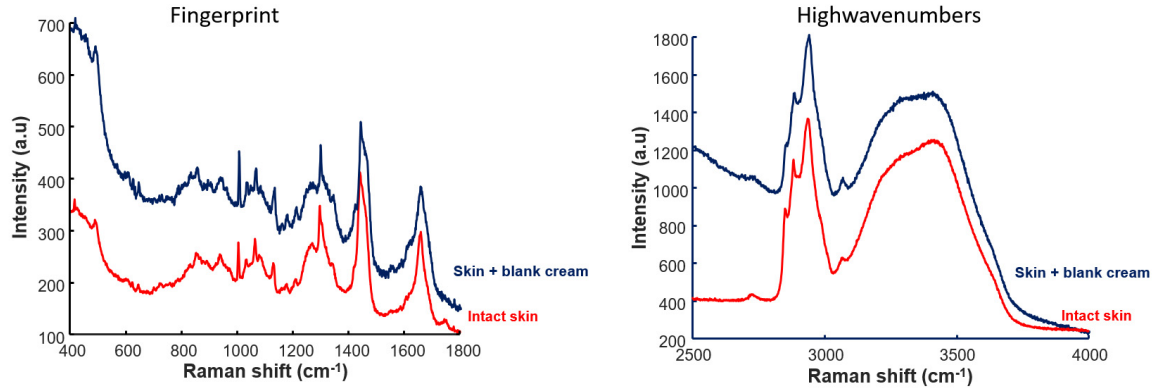

**Figure S1.** Raman spectra of rat skins before and after skin-on-a-chip with 5h blank cream exposure. The figure shows the mean spectra of 0  $\mu\text{m}$  to 28  $\mu\text{m}$  depths for FP and of 0 to 40  $\mu\text{m}$  for HWN region,  $n = 40$ . The spectra demonstrate the main characteristic features observed originated from the lipids, nucleic acids, and proteins which are found in the skin (1655, 1440 and 1469 , 1303, and 1005  $\text{cm}^{-1}$ ) and are present at the same position (no shift) before and after the skin-on-the-chip experiment. These results indicate that chip experiment using blank cream do not impact the skin composition.

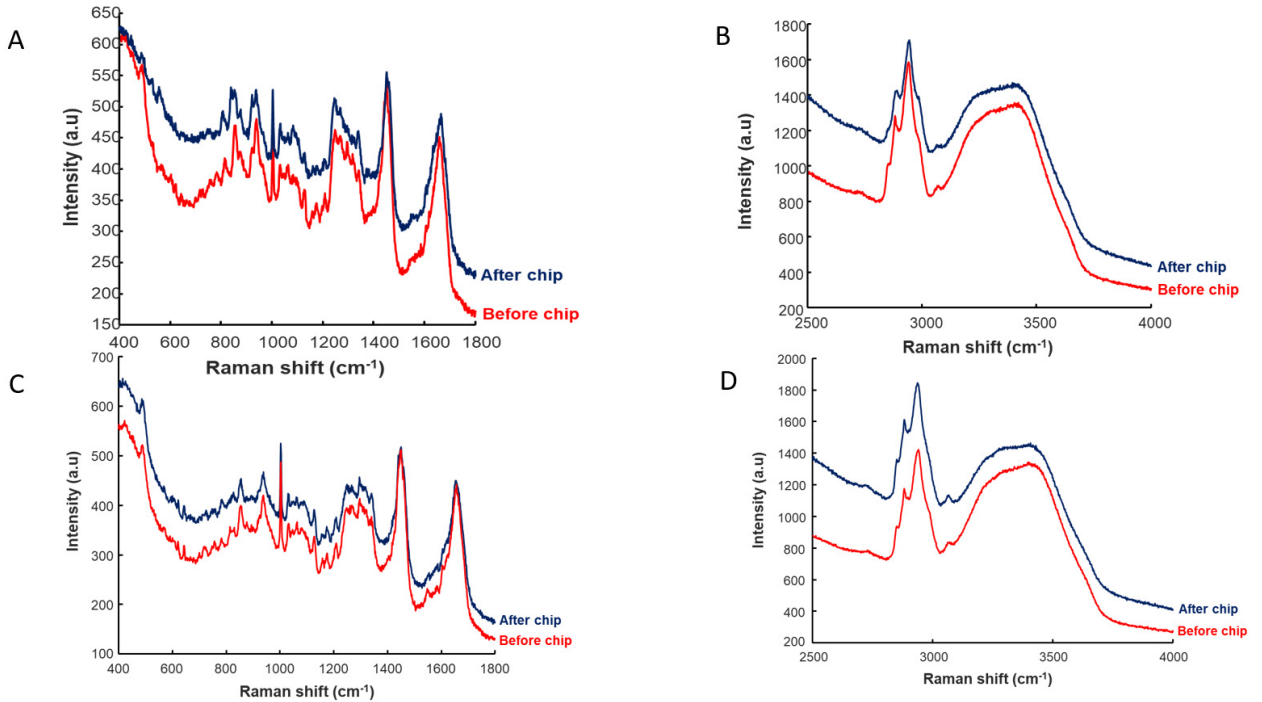

**Figure S2.** Raman spectra of rat skins before and after skin-on-a-chip and 5h caffeine (A,B) or quinidine (C,D) exposure. The figure shows the mean spectra of 0  $\mu\text{m}$  to 28  $\mu\text{m}$  depths for FP and of 0 to 40  $\mu\text{m}$  for HWN region,  $n = 40$ . The spectra demonstrate the main characteristic features observed originated from the lipids, nucleic acids, and proteins which are found in the skin (1655, 1440 and 1469 , 1303, and 1005  $\text{cm}^{-1}$ ) and are present at the same position (no shift) before and after the skin-on-the-chip experiment. These results indicate that chip experiment using caffeine or quinidine creams do not impact the skin composition.
